# Supplementary material for: Earthquake insurance in Iran: Solvency of local insurers in light of the current market practice
Source: Copernicus journal article supplement (doi:10.5194/nhess-2023-81), 2023-06-16
Supplement: Supplementary file [file nhess-2023-81-RC1-supplement.pdf]

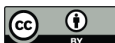

## 24 1 Introduction

25 Being located in one of the most seismically active regions in the world, Iran has witnessed many devastating  
26 earthquakes through history, such as the 1978 M7.4 Tabas (USD 11 mn), the 1990 M7.4 Manjil–Rudbar (USD 2.8 bn),  
27 the 2003 M6.6 Bam (USD 1.5 bn), and most recently the 2016 M7.3 Sar-e Pol-e Zahab (USD 5 bn) [ (Ibrion, Mokhtari,  
28 & Nadim, 2015) and (Maghsoudi & Moshtari, 2020)]. Although almost all these events occurred in rural areas or  
29 small-size cities with less than 100 thousand of inhabitants, the resulting socio-economic consequences have been  
30 substantial. If a similar magnitude earthquake struck a major Iranian city with millions of populations, the volume of  
31 physical and human losses would be much higher.

32 To compensate a part of earthquake losses and facilitate the process of reconstructions, Iranian insurance firms offer  
33 earthquake insurance as a rider of fire policy. However, despite the common practice in the global insurance market,  
34 almost none of the domestic insurers use catastrophe risk models to quantify seismic risk for pricing policies,  
35 purchasing reinsurance, and managing accumulated risks. Instead, old-fashion and seemingly underestimating  
36 pricing tables are still utilised nationally to determine earthquake insurance policies based on main construction  
37 materials and geographical location of insured buildings. This pricing approach is likely to result in insurance  
38 companies collecting insufficient premiums to cover future catastrophe losses. In a similar way, on the regulatory  
39 side, the solvency capital for catastrophe properties is not risk-based and is determined according to the amount of  
40 premium collected (which seem to be not commensurate to risk) and history of company's losses (which does not  
41 reflect long-return period events risks like earthquakes). To date, due to the low penetration rate of insurance in  
42 Iran, about 1.8% in 2022, catastrophe risks assumed by Iranian insurance companies are not significant, implying  
43 that even in the event of medium to large natural catastrophes, the insurance losses usually are reimbursable by the  
44 insurers. With the expected Iran Building Catastrophe Insurance Pool (IBCIP) starting to operate in 2023, all  
45 residential buildings will be covered under a national policy. As such, there will be likely considerable business  
46 opportunities for domestic insurers to extend their catastrophe property portfolio to provide supplementary  
47 coverage to the primary protection which IBCIP offers. These new business opportunities, although financially  
48 attractive, can dramatically expose Iranian insurance and reinsurance companies to natural hazards risk. In other  
49 words, in the event of major catastrophe events, such as earthquakes in urban cities or widespread flooding, which  
50 are likely in the Iranian geography, many local insurers can quickly become insolvent. These said, it is essential to  
51 examine the of sufficiency of the current insurance rates and the effectiveness of the solvency capital requirements  
52 mandated by Central Insurance of Iran (CII) to cover future catastrophe losses to happen in Iran.

53 In so doing, two parallel approaches have been followed. First, a probabilistic earthquake risk model was developed  
54 which help calculate risk-based pricing framework for earthquake insurance policies. The model entails components  
55 of a standard catastrophe risk model, namely exposure, hazard, and vulnerability which are separately adopted,  
56 tailored, or developed based on the state-of-the-art methodologies and up-to-date data. These components are  
57 convolved using GEM's OpenQuake as a probabilistic risk assessment platform to generate risk output such as  
58 Average Annual Loss (AAL) and loss Exceedance Probability (EP). In addition, a similar risk-based methodology to  
59 what employed by the European insurance solvency regime, Solvency II, was adopted to create a standard formula  
60 for determining solvency capital for given earthquake risk portfolios. A hypothetical portfolio of earthquake risks  
61 was assumed to compare the factor-based solvency capital (as mandated by CII) with a risk-based one (as  
62 determined following Solvency II methodology) to examine the sufficiency of the current earthquake rates and  
63 solvency capital. Further, the profitability of the underwriting and the likelihood of solvency is benchmarked using  
64 the values generated using the risk-based pricing method and the standard formula of solvency capital.

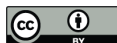

65 This paper comprises five sections. First, a background on insurance solvency with a focus on the European Solvency-  
66 II and its proposed method for calculating risk-based solvency capital earthquake is provided in Section 2. Then,  
67 Section 3 briefly describes the evolution of earthquake risk models in Iran. Section 3 provides information on the  
68 methodology adopted to calculate risk parameters such as AAL and EP (99.5% percentile) and estimate risk-based  
69 solvency capital for a portfolio of risks with earthquake coverage. Numerical results of the proposed methodology  
70 are outlined in Section 4, where the solvency capital of a hypothetical portfolio of risks under earthquake policy is  
71 calculated using the current factor-based and the proposed risk-based methods. A discussion on the differences  
72 between the two methods and possible consequences on the viability of Iranian insurers is given in Section 5. And  
73 finally, section six concludes the process and its findings. A reference list is also provided at the end of the article.

## 74 2 Natural Catastrophe Insurance Regulations in the European Union (EU) and Iran

75 The significance of natural catastrophes and their impact on the viability of insurance firms has received increasing  
76 attention over time, and the occurrence of major catastrophic events such as Hurricane Andrew (1992), the  
77 Northridge Earthquake (1994), Hurricane Katrina (2005), the 2011 Great East Japan Earthquake and Tsunami has  
78 highlighted the issue. Catastrophe losses engender the solvency of small and medium reinsurance firms and  
79 consume the accumulated provisions of well-capitalised reinsurers (Anderson, 2002). While, to many, the term  
80 catastrophe is closely associated with natural hazards (e.g. **earthquake, flood and windstorm**), it can also be used to  
81 address intensive damages from human-made events (Lawson, Card, & Vass, 2001). Catastrophe risks have different  
82 characteristics compared to non-catastrophe losses. They are highly dependent and occur so rarely that historical  
83 claim data could not be efficiently utilised to predict future losses. As a result, the insurance industry has evolved to  
84 prepare for the consequences imposed by disasters by developing risk management rules and regulations. This  
85 section provides a brief history of the regulations regarding the insurance solvency capital as a risk management  
86 measure in the insurance industry, focusing on the European Solvency-II regime and the solvency regulations set by  
87 the Central Insurance of Iran (CII) as the national insurance regulator. In addition, technical aspects of calculating  
88 SCR in the two abovementioned regulatory systems are described with brevity.

### 89 2.1 European Insurance Solvency Regulation

90 In 2004, Thorburn **has** provided a history of the difficult times that catastrophic losses created for the insurance  
91 industry and the countries' response to these challenges in the form of developing insurance regulatory institutions  
92 and adopting solvency mandates as an effective measure to manage catastrophe risks to which insurers are exposed  
93 (Thorburn, 2004).

94 In general, insurance supervision aims to protect policyholders' interests by ensuring a sound financial operation  
95 and proper management in the insurance business. Therefore, effective regulations must be established to evaluate  
96 insurers' liabilities adequately and determine provisions to cover these commitments. It is also necessary to consider  
97 an extra layer of protection in the form of capital margin to respond to unexpected financial shocks, e.g. catastrophic  
98 losses. That is why solvency supervision regulations were established and improved over time.

99 Catastrophic losses, both natural and man-made, have resulted in higher claims provisions, reduced capital power,  
100 reduced profitability, and in some cases, made insurance firms insolvent. Remarkable examples of such bankruptcies  
101 are the 1906 San Francisco earthquake with 12 insurance companies declared insolvent, the 1992 Hurricane Andrew  
102 with nine firms being bankrupt, and the 2011 Christchurch quakes that resulted in the ruin of two insurance  
103 companies (Kelly & Stodolak, 2013).



104 The first steps in harmonising Europe-wide insurance supervision were taken by the approval of the first non-life  
105 and life insurance Directives in the 1970s [ (First Council Directive, 1973), (First Council Directive, 1979)]. These  
106 directives required the European Member States to comply with harmonised solvency capital requirements. The  
107 Directives were later revised by adding second and third amendments in 1982 and 1992 [ (Second Council Directive,  
108 1988), (Council Directive, 1990), (Directive, 1992), (Council Directive, 1992)] The entirety of these regulations, which  
109 were later named Solvency-0 by (Sandström, 2019), underwent a comparative examination in the 1990s, showing  
110 that they were not sufficiently taking into account the full spectrum of risks that insurance companies were exposed  
111 to. As such, new directives (known as Solvency I) were again introduced to both life and non-life insurance in 2002  
112 to fortify the stance of insurers in the event of catastrophic losses ( (Directive, 2002), (Directive, 2002)). Both  
113 Solvency-0 and Solvency-I regulations followed a similar approach in determining the Solvency Capital Margin, which  
114 was mainly based on factoring gross earned premium and gross incurred claims (Sandström, 2019). However, this  
115 was only a transitional remedy to incorporate a risk-based approach in the insurance solvency capital requirement  
116 regulations, as Solvency I was still inefficient in terms of asset and liability valuation and capital allocation (Rae, et  
117 al., 2018). A drastic reform to solvency regulation was introduced about one decade later as the Solvency-II  
118 Framework.

119 Influenced by the then-new risk-based banking regulation, Basel-II (Basel Committee on Banking Supervision, 2004),  
120 Solvency-II, the latest European insurance supervising regime, replaced Solvency-I in 2016. This new regime provides  
121 a more comprehensive risk-based approach for determining solvency requirements for insurance undertakings. The  
122 new regulation also includes a market-based valuation system for assessing companies' assets and liabilities  
123 (Directive, 2009). With a higher degree of confidence, this could potentially reduce the risk of insurance firms being  
124 insolvent. In addition, the Directives contribute to the harmonisation of insurance supervision in the European  
125 market. Solvency-II encompasses three pillars, the first of which, Pillar I, sets out rules for calculating risk-based  
126 technical provisions. Two types of capital requirements are represented in Pillar I: the Minimum Capital Requirement  
127 (MCR), which is the least authorised capital of insurance companies, and the Solvency Capital Requirement (SCR)  
128 which enables an insurance institution to absorb significant financial shocks, giving reasonable assurance to  
129 policyholders and beneficiaries. Under the underwriting risk category, the institution can use either a Standard  
130 Formula or an Internal Model, each having its pros and cons regarding the level of sophistication and SCR size.  
131 Despite all the promising features and improvements of Solvency-II, it has been subject to much research since its  
132 introduction [ (Rae, et al., 2018), (Linder & Ronkainen, 2004), (Kousky & Cooke, 2012), (Gurenko & Itigin, 2013),  
133 (Clarke, Mitchell, & Phelan, 2014), (Baione, De Angelis, & Granito, 2018), (Deligiannakis, Zimbidis, & Papanikolaou,  
134 2021)]. These researches mainly focused on the areas such as economic justification of the then-new solvency  
135 regime, different results obtained using the Standard Formula of Solvency-II and Internal Models, comparison  
136 between the implications of Solvency II and Solvency I, and possible improvements to the new directive.

## 137 2.2 Iranian Insurance Solvency Regulation

138 The Central Insurance of Iran (CII) is the regulator of the Iranian insurance market. As one of its principal duties, CII  
139 approves and enacts decrees and directives through the High Council of Insurance (HCI) to regulate different aspects  
140 of the insurance business in Iran (High Council of Insurance, 2019). Before the approval of the first Directive on the  
141 solvency capital adequacy, CII supervised the operation of Iranian insurance firms by examining monthly reports on  
142 companies' collected premiums and paid claims (Hashemi, Safari, & Kamali-Dolatabadi, 2010). As the pricing system  
143 in the Iranian insurance market was no longer tariff-based then, new regulations needed to be developed and  
144 implemented by CII to monitor the financial solvency of insurance firms. Consequently, Directive 69 was approved  
145 and enacted by HCI in 2011, which required insurance firms to put aside a factor-based solvency capital for four



146 categories of risks: insurance, market, credit, and liquidity. The Directive also recognized the market value (compared  
147 to book value) as the correct method of valuing own funds in the accounting system. This regulation, which is still in  
148 place, represents five classes of solvency. A company belongs to the first solvency capital level when it keeps a  
149 solvency capital equal to or greater than the Solvency Capital Margin (SCM). Should an insurance company fail to  
150 maintain a sufficient solvency margin, it enters levels 2 to 5 depending on the capital deficit. At level 5 of solvency,  
151 CII can officially cancel the business permission of the insolvent firm. For natural catastrophe policies (fire,  
152 engineering, motor, and life), the SCM is the greatest of gross earned premium and gross incurred claims, each  
153 multiplied by a fixed risk factor (Similar to Solvency-0). These fixed factors were calculated based on an assessment  
154 carried out on the financial statements of Iranian insurance firms and the financial time series of the Iranian real  
155 estate and stock market. The computed solvency capitals of the named risks are ultimately combined assuming zero  
156 correlation between risks to form the company's SCM. Directive No. 69 was reviewed by Shahriar et al., and a  
157 number of improvements regarding changing the risk metric to VaR, using a 99% confidence level for calculation  
158 SCM, and consideration of linear correlation for different risks was suggested (Shahriar, et al., 2016).

### 159 3 Methodology and Data

160 This section describes the theoretical framework of the quantitative comparison between the methods for  
161 calculating earthquake risk solvency in the Solvency-II Directive and Directive 69 of the Iranian insurance regulation.  
162 In so doing, mathematical formulations are detailed in both methodologies, encompassing the selection of risk  
163 metrics, risk factors, and implementation of the risk diversification effect. Then, as a pre-requisite for calculating the  
164 solvency capital, components of a stochastic earthquake risk model for Iran are outlined, covering seismic hazard,  
165 vulnerability, exposure, and financial calculation modules. The introduced earthquake risk model estimates the 99.5  
166 loss percentile and Average Annual Loss (AAL) of earthquakes in Iran as input to Solvency-II formulas. To feed  
167 Directive 69, the conventional earthquake risk pricing table of the industry is utilised.

168 A portfolio of 1500 residential dwellings across five provincial capital cities of Tehran, Esfahan, Tabriz, Ahvaz and  
169 Kerman has been considered to compare the earthquake risk solvency charge calculated by each methodology. The  
170 reason for selecting these capital cities is that they are located in various **and** seismicity zones and contain different  
171 **composition** of construction types. This allows us to consider the effect of diversification in the comparison process.

#### 172 3.1 Calculation of earthquake solvency capital

##### 173 3.1.1 Directive 69

174 High Council of Insurance (2011) requires insurance and reinsurance institutions to hold eligible own funds as the  
175 solvency capital using the fixed factors determined for different types of risks, namely underwriting, market, credit  
176 and liquidity risks. The Directive provides risk factors for miscellaneous lines of business, including catastrophe fire  
177 insurance (non-life) without any distinction between various natural catastrophes in terms of fixed risk factors and  
178 assumes zero correlation between risks in different lines of business and geographies (meaning that losses are  
179 deemed fully independent). According to this directive, to calculate the solvency charge of a property catastrophe  
180 portfolio, first, the products of gross earned premiums and gross incurred claims with their corresponding risk factors  
181 (0.580 and 0.841, respectively) are computed, and then the greatest of these values is considered as the solvency  
182 capital. Since no reliable information on the gross incurred earthquake loss claims **were** available to us at the time  
183 of writing this paper, we only use the term determined by gross earned premiums. In so doing, average values of  
184 earthquake premium rates of five Iranian insurance firms, which were extracted from a popular Iranian insurance

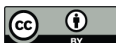

185 quotes aggregator website<sup>3</sup> are employed to calculate the premium-based part of the formula for the portfolio.  
 186 These rates are still based on a study conducted in 1991 by Ghafory-Ashtiany (1991) who determined the relative  
 187 riskiness of different construction types in various seismic zones in Iran (please see the original table at Table A1).  
 188 Table 1 presents averaged earthquake insurance premiums for masonry, concrete and steel buildings of 10 years of  
 189 age in five provincial capital cities of different tectonic natures and seismic hazard levels. Needless to say, the  
 190 portfolio of risks used for the comparative analysis is consistent with construction characteristics assumed in the  
 191 earthquake premium table.

**Table 1: Earthquake premium rates (in 1000) for different types in various province capital cities in Iran**

| Province        | County  | City    | Construction type |       |          |
|-----------------|---------|---------|-------------------|-------|----------|
|                 |         |         | Masonry           | Steel | Concrete |
| Tehran          | Tehran  | Tehran  | 1.1               | 0.50  | 0.50     |
| East Azarbayjan | Tabriz  | Tabriz  | 1.1               | 0.50  | 0.49     |
| Esfahan         | Esfahan | Esfahan | 0.78              | 0.33  | 0.32     |
| Kerman          | Kerman  | Kerman  | 1.1               | 0.37  | 0.36     |
| Khuzestan       | Ahvaz   | Ahvaz   | 0.78              | 0.33  | 0.32     |

192

### 193 3.1.2 Solvency-II

194 As outlined in Annex IV of Directive 2009/138/EC (2009) and CEIOPS (2010) on the application of the natural  
 195 catastrophe Standardised Scenarios (standard formula), to calculate earthquake charge, the Weighted Total Value  
 196 Insured (WTIV) should be computed at CRESTA level using the Total Insured Value (TIV) for each line of business.  
 197 Eq.1 presents the mathematical formulation of this stage [ (Directive, 2009), (Committee of European Insurance and  
 198 Occupational Pensions Supervisors (CEIOPS), 2010)].

$$WTIV_{ZONE} = F_{ZONE} \times TIV_{ZONE} \quad \text{Equation 1}$$

199 Since the 99.5% Value at Risk (VaR), as the risk factor, are provided at the country level in CEIOPS (2010), a relativity  
 200 factor ( $F_{ZONE}$ ) takes the role of adjusting the national risk factor at subnational (CRESTA) level in the Standardised  
 201 Scenario. The catastrophe capital charge ( $CAT_{peril-ctry}$ ) is then calculated by applying the effect of geographical  
 202 aggregation of WTIVs of different CRESTA zone within the country of interest multiplied by  $Q_{CTRY}$  (1-in-200-year risk  
 203 factor of earthquake at country level). Eq.2 illustrates the calculation of solvency capital required for earthquake risk  
 204 at the country level.

$$CAT_{PERIL-ZONE} = Q_{CTRY} \times \sqrt{[WTIV_{ZONE}]^T [AggMat] [WTIV_{ZONE}]} \quad \text{Equation 2}$$

205 Where  $[WTIV_{ZONE}]$  is the array presentation of WTIV within the country (of interest and  $[WTIV_{ZONE}]^T$  is its  
 206 transposed form.  $[AggMat]$  is basically a correlation matrix determining how different CRESTA zones are correlated  
 207 to each other in terms of experiencing simultaneous earthquake loss and it comprises elements of 1 (fully  
 208 correlated), 0.5 (semi correlated), 0.25 (slightly correlated), and 0 (no correlation). CEIOPS (2010) provides sub-  
 209 country correlation matrices for EEA countries in an excel spreadsheet.

<sup>3</sup> Azki.com

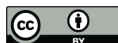

210 To follow the procedure proposed by Solvency II to calculate the catastrophe charge for earthquake risks in Iran, we  
211 use the output of a stochastic earthquake risk model developed in this study, separately presented in section 3.2.  
212 This catastrophe model can produce risk results (e.g. AAL or 1-in-200-year loss) at finer administrative levels than  
213 CRESTA. In accordance with local underwriting and risk management practice in Iran, we use the county-level  
214 resolution to calculate the solvency capital. Therefore, there is no need to use a relativity factor for TIV at the county  
215 level since we already have the Q factor for each county. That said, we can rewrite Eq.1 to Eq.3:

$$CAT_{EQ-County} = Q_{County} \times TIV_{County} \quad \text{Equation 3}$$

216 Here, we can directly calculate each county's catastrophe charge for earthquake risk. Following that, we aggregate  
217 these charges at a province and then national level to determine the total solvency capital for a given portfolio of  
218 earthquake risks. Eq.4 and Eq.5 exhibit the mathematical form of these calculations.

$$CAT_{PERIL-ZONE} = \sqrt{[WTIV_{ZONE}]^T [AggMat_{Province}] [WTIV_{ZONE}]} \quad \text{Equation 4}$$

219

$$CAT_{PERIL-ZONE} = \sqrt{[WTIV_{ZONE}]^T [AggMat_{County}] [WTIV_{ZONE}]} \quad \text{Equation 5}$$

220 The symmetric aggregation matrices for province and country levels are constructed using either 1 (fully correlated),  
221 0.5 (semi-correlated), 0.25 (slightly correlated) and 0 (non-correlated) members. It is assumed, mainly considering  
222 distance factor, that each county is fully correlated with itself and **semi correlated** with its neighbouring counties. In  
223 the case of provinces, due to the larger size, the neighbouring provinces are assumed to be slightly correlated.

### 224 3.2 Modelling the Earthquake Risk in Iran

225 As a requisite for using a risk-based methodology in calculating the earthquake risk capital charge, for example, the  
226 described method by Solvency-II, it is necessary to have a stochastic catastrophe model for quantifying the required  
227 percentile of confidence of seismic losses (here, 99.5%) at different locations and various construction types. This  
228 subsection explains how we developed an earthquake risk model for Iran utilising the most reliable methodologies  
229 and the highest quality of data. The subsection describes the risk model components: the calculation platform  
230 (OpenQuake), seismic hazard model, residential building exposure model, and vulnerability functions. Because this  
231 paper's main objective is to compare solvency capital calculation methods, efforts were made to keep the risk model  
232 development description as brief as possible.

233 The common practice for quantifying natural catastrophe risks in the insurance industry is (event-based) stochastic  
234 catastrophe modelling. The process incorporates three main components of hazard, exposure and vulnerability using  
235 a Monte Carlo simulation method to generate event loss tables (ELT). ELTs are used to calculate risk parameters such  
236 as Average Annual Loss (AAL) and loss Exceedance Probability (EP) curves which are employed for various  
237 underwriting and risk management decisions in the business. The practice of modelling seismic risk in Iran is rather  
238 in its early stage and a few studies have been conducted on catastrophe modelling over the last decade, e.g.  
239 (Ghafory-Ashtiany & Nasserjadi, 2012), (Pakdel-Lahiji, Hochrainer-Stigler, Ghafory-Ashtiany, & Sadeghi, 2019),  
240 (Motamed, Calderon, Silva, & Costa, 2019), (Shahbazi, Mansouri, Ghafory-Ashtiany, & Käser, 2020), and (Bastami,  
241 Abbasnejadfar, Motamed, Ansari, & Garakhaninezhad, 2022). In this study, the open-source OpenQuake platform  
242 developed by the Global Earthquake Model (GEM) foundation was utilised to do the seismic risk modelling job, due





243 to its recognition in the insurance market and its flexibility in terms of input data and generation of required risk  
244 parameters.

### 245 3.2.1 Seismic hazard model

246 After reviewing several available studies on the seismic hazard of Iran [ (Motamed, Calderon, Silva, & Costa, 2019),  
247 (Mirzaei, Gao, Chen, & Wang, 1997), (Tavakoli & Ghafory-Ashtiani, 1999), (Yazdani & Kowsari, 2013), (Şeşetyan, et  
248 al., 2018), (Khodaverdian, Zafarani, & Rahimian, 2016), (Pagani, Garcia-Pelaez, Gee, & al., 2020)), the Earthquake  
249 Model of Middle East (Şeşetyan, et al., 2018) was selected due to the availability of its OpenQuake-ready input data  
250 and credibility of the study in the earthquake engineering society. The seismic model comprises two models for line  
251 and area sources in Iran, a set of Ground Motion Prediction Model Equations (GMPE) for different seismic source  
252 characteristics in Iran (including active shallow crustal, stable shallow crustal, subduction, and deep seismicity  
253 sources), and two logic trees for treating epistemic seismic hazard uncertainty, and a soil model based on  
254 methodology suggested by Allen and Wald for taking into account amplification effect of soil (Allen & Wald, 2009).  
255 Figure 1 illustrates the Peak Ground Acceleration (PGA) distribution with an equivalent return period of 475 years in  
256 Iran, using the EMME seismic hazard model.

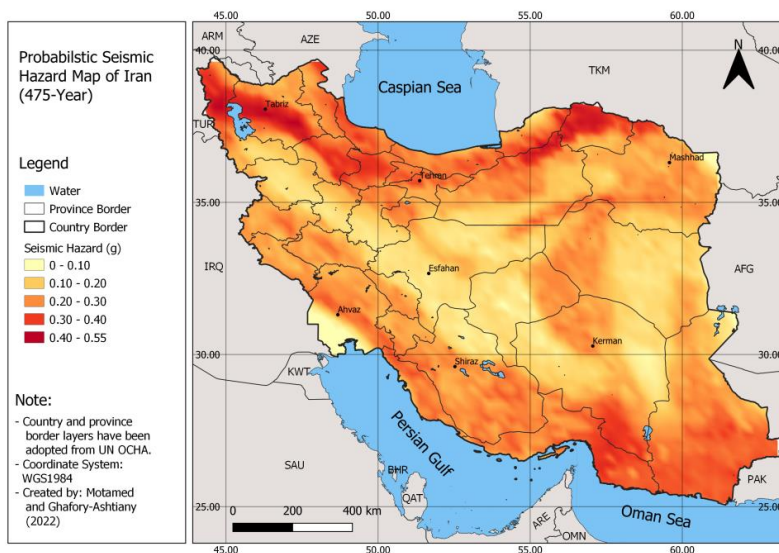

Figure 1: Spatial distribution of hazard parameter (PGA) of 475-year return period

257 As seen in Figure 1, the northern part of the country (Alborz and Koppe-Dagh seismotectonic zones), including the  
258 cities of Tabriz and Tehran, and south-eastern regions (central Iran and Makran zones) containing the city of Kerman  
259 show the highest levels of seismic hazard. On the flip side, the cities of Esfahan in central Iran and Ahvaz in south-  
260 western Iran belong to zones with the lowest PGA levels.

### 261 3.2.2 Residential building exposure model

262 The basis for building a residential building exposure model for Iran is the census data collected in the two census  
263 years of 2011 and 2016. Because of the COVID-19 pandemic, the 2021 census survey faced delay and was not ready  
264 at the time of the study. Based on the best practice of catastrophe modelling, an ideal exposure model should





265 contain fields relating to the location, replacement cost, and construction characteristics such as type of material,  
266 number of storeys, and vintage of construction. Iran's 2011 building and population census collected information on  
267 the location (at the county-level data which is publicly available), construction year, and materials types. No  
268 information on the height of structures or number of storeys is gathered in five-year censuses, so, we assumed low  
269 (1-2 storeys) height for adobe and masonry, and medium height (3-6 storeys) for steel and RC buildings. This decision  
270 is in accordance with the assumptions made by Mansouri, Kiani and Amini-Hosseini, whose vulnerability curves were  
271 used in this study (Mansouri, Kiani, & Amini-Hosseini, 2014).

272 Another challenge was that in **2016 census** the housing census stopped collecting data on the year of residential  
273 building construction. To overcome this problem, the construction time field of **2011 census** data were upgraded by  
274 considering a set of expert-based assumptions. For instance, we assumed that the **number dwellings** increased in  
275 each county after the census 2011 were constructed with modern **material** such as steel and RC and according to  
276 the most recent Iranian seismic code (Standard 2800 version 4). We divided the age of buildings into three classes  
277 of pre-1985, between 1986 and 2005, and post-2006 which were approximately consistent with the data of **national**  
278 census and dates **where different** version of the Standard 2800 came into force. The **building vintage** was used as a  
279 proxy for the quality of construction.

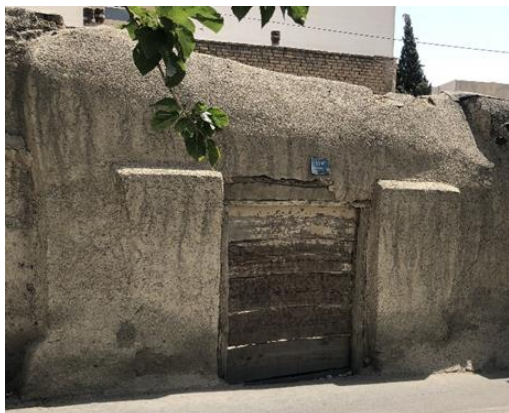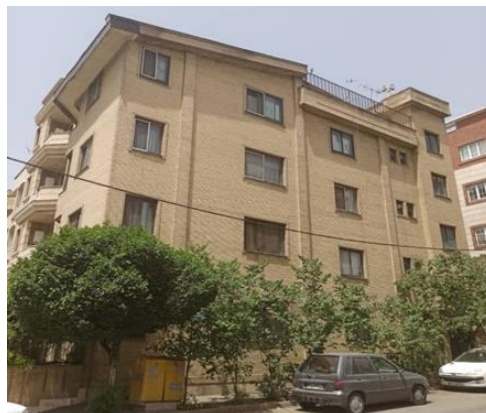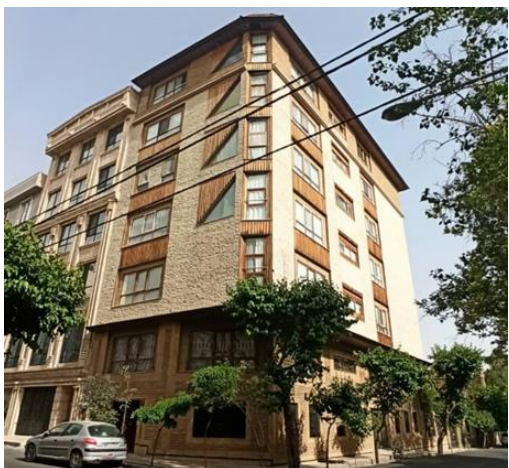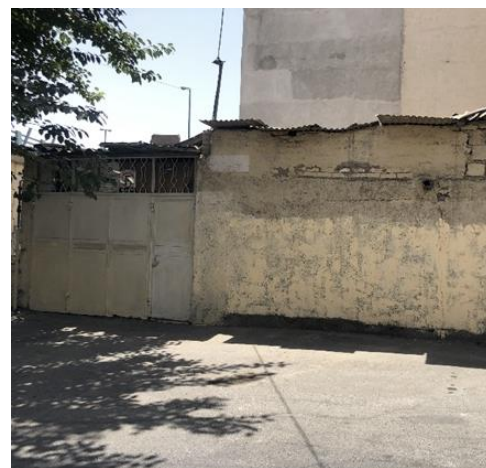



Figure 2: Examples of different construction classes in District 2 of Tehran: adobe (upper left), steel (upper right), reinforced concrete (lower left), masonry (lower right)

Photos by Ms. Niloofar Kazemi Asl

280

281 We used an auxiliary population dataset with a 30-arc-second resolution to disaggregate the county-level building  
282 exposure data to gain a finer resolution for the loss calculation purpose. Figure 3 presents the spatial distribution  
283 and value of different types of residential buildings in Iran at the county level.

284

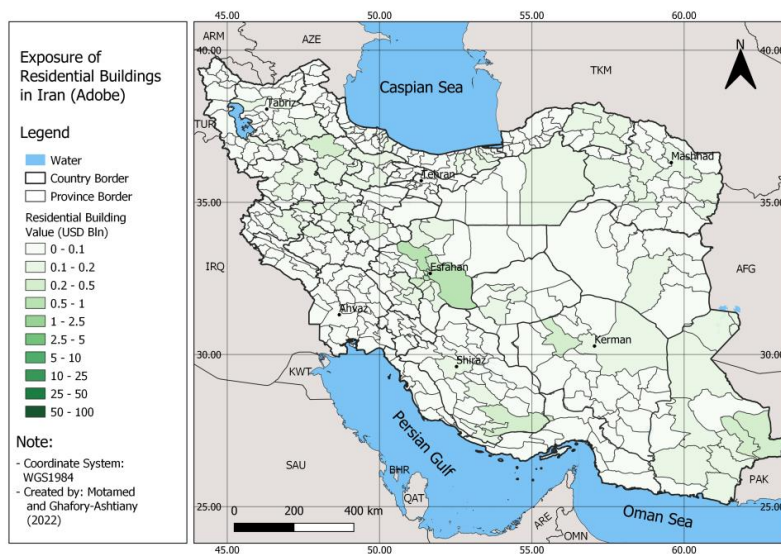

(a)

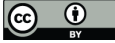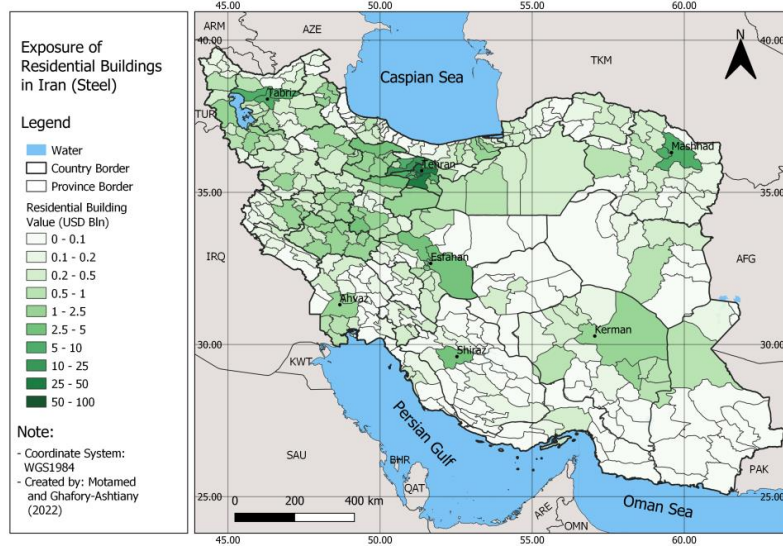

(b)

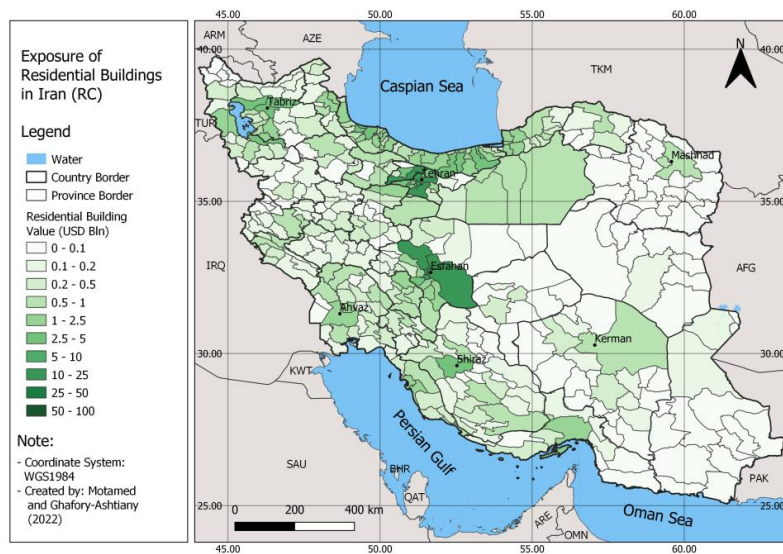

(c)

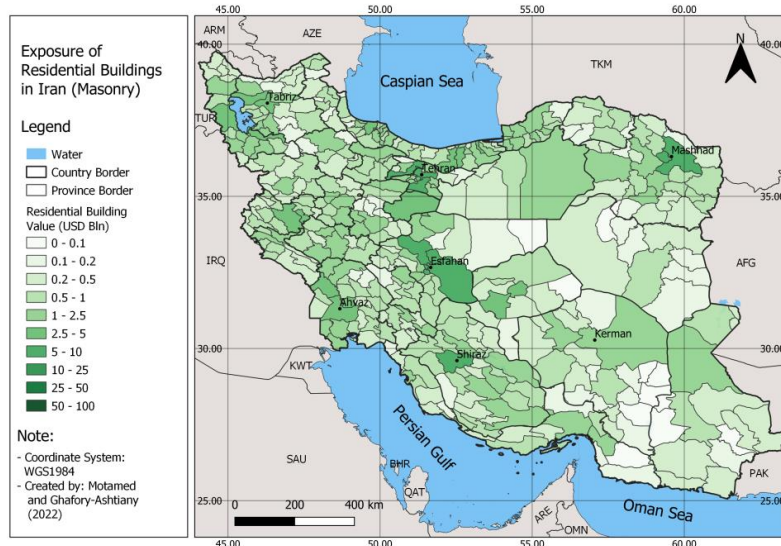

(d)

Figure 3: Exposure of residential buildings in Iran, adobe (a), steel (b), concrete (c), and masonry (d)

285 Most residential buildings are concentrated around the highly-populated province capital cities of Tehran, Tabriz,  
286 Esfahan, Mashhad and Shiraz. As observed, the more vulnerable types of construction (adobe and masonry) have  
287 expanded around Esfahan, Shiraz, Kerman, and in the southeastern corner of Iran by the Pakistan border. The more  
288 resistant classes of building such steel and RC have more prevalence in provinces of Tehran, East Azarbayjan (with  
289 Tabriz as capital city), Esfahan, and to some extent in Razavi Khorasan (with Mashhad city as capital). According to  
290 statistical analyses on the exposure data, about 55% of residential building in 2016 were made of modern  
291 construction materials such steel and RC, while the remaining 45% belonged to other types including masonry and  
292 adobe.

### 293 3.2.3 Vulnerability model

294 To estimate the damage ratio of exposed assets under a given earthquake scenario with known intensity parameters  
295 (e.g. PGA, PGV, or MMI), it is necessary to use vulnerability functions. These are typically functions or curves that  
296 relate various levels of hazard intensity to damage ratio or percentage for specified types of groups of assets  
297 (vulnerability classes). In this study, the vulnerability curves developed by Mansouri and Amini-Hosseini [38] as one  
298 of the components of the project Earthquake Model for Middle East (EMME) (Şeşetyan, et al., 2018) was used due  
299 to the reliability of the methodology used (RISK-UE) and the credibility of the main project (EMME).

300 These curves represent the seismic vulnerability of nine building classes of adobe (one class), masonry (two classes),  
301 steel (three classes), and reinforced concrete (three classes). Figure 3 exhibits examples of these curves for different  
302 types of building with medium-quality construction.



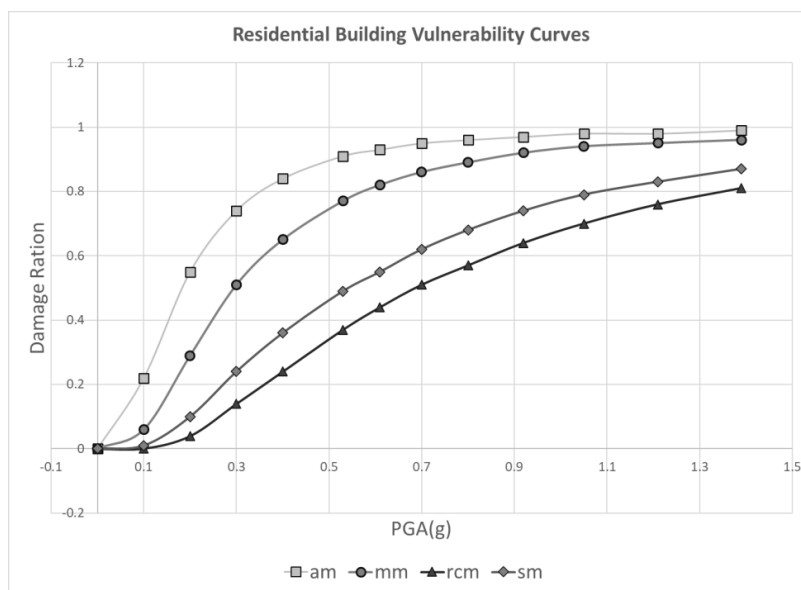

Figure 4 Vulnerability curves for medium-quality adobe (am), masonry (mm), reinforced concrete (rcm), and steel (sm) buildings

303

304 As shown in this diagram, adobe is the most vulnerable class of building to earthquakes, while RC and steel buildings  
305 offer the highest resistance to seismic loads. Masonry buildings fall within these two ranges.

#### 306 4 Results and Discussion

307 After preparing the risk model components, a comprehensive event-based probabilistic seismic risk assessment for  
308 the entire country and risk results were generated. The results include risk metrics such as AAL and EP (99.5%  
309 confidence) for nine most-common classes of Iranian buildings. We utilised EP results for calculating the SCR of the  
310 chosen portfolio of residential buildings according to the Solvency-II Directive instructions. In parallel, the solvency  
311 capital of the portfolio was computed using the factor-based method introduced by the Iranian Directive No. 69. The  
312 section concludes with a comparative analysis between the current market earthquake premium rates in Iran and  
313 those calculated by the model, as well as a comparison between the Solvency-II and Directive 69 solvency capitals.  
314 In the end, some recommendations for enhancing the efficiency and accuracy of Directive No. 69 of the Central  
315 Insurance of Iran.

#### 316 4.1 Earthquake Risk Assessment Results

317 Figure 4 shows the spatial distribution of seismic AAL aggregated at the county level. As observed, almost all parts  
318 of the country are exposed to medium and high levels of seismic risk, except for sparsely populated areas of central  
319 deserts and the northern coasts of the Oman Sea. There are also visible high-risk counties, especially around major  
320 cities of Tehran and Tabriz in northern and north-western Iran, as well as in other populated areas proximate to  
321 Mashhad (northeastern Iran), Esfahan (central Iran), and Ahvaz, Shiraz and Kerman in southern parts of the country.  
322 This pattern seems to be in accordance with the distribution of different classes of buildings and their exposure to



323 the seismic hazard (please see figures 1 and 2); in areas with a concentration of buildings and very high level of  
324 earthquake hazard (such as in Tehran and Tabriz cities) the seismic risk is the highest. Similarly, we can witness a  
325 high potential of loss in the populated southern cities of Ahvaz, Shiraz and Kerman, that are subject to medium to  
326 high seismicity. The city of Esfahan, despite being located in a low seismicity zone, also shows high seismic risk solely  
327 due to its very high building exposure (the second-highest exposure value after Tehran) and the prevalence of more  
328 vulnerable building classes of masonry and adobe. In south-eastern Iran, where the province of Sistan and  
329 Baluchestan exists a high level of risk could be distinguished, mainly because of the existence of extremely vulnerable  
330 types of buildings (e.g. adobe) and despite the low concentration of built environment.

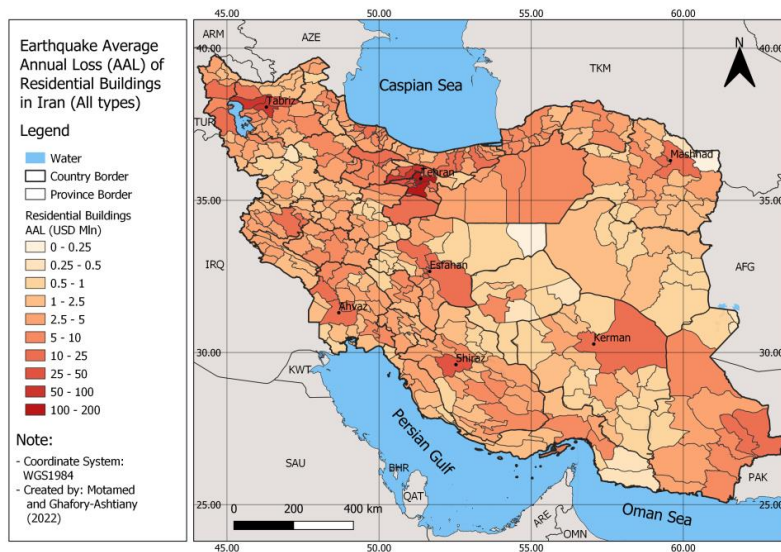

Figure 5 Earthquake Average Annual Loss (AAL) of residential buildings in Iran (million USD)

331 From what figure 5 presented as the spatial pattern of one-in-200-year losses of earthquakes in Iran, one could  
332 acquire an idea of the level of earthquake insurance capital required by the Solvency II regime for different types of  
333 buildings at the county level in Iran. Assuming a 100% insurance coverage for residential homes in Iran, the SCR or  
334 1-in-200 loss for steel and RC buildings would be the highest in Tehran, Tabriz, and to a lower extent in Esfahan (and  
335 their surrounding counties). The situation is more homogenous for masonry structure (because of its prevalence in  
336 the entire country), where significant seismic losses with 99.5% confidence could be distinguished in almost all major  
337 cities in the country, namely Tehran, Tabriz, Mashhad, Esfahan, Kermanshah, and Kerman. In terms of adobe  
338 construction, again, a medium-to-high degree of losses could be expected in many counties except for areas located  
339 in Khuzestan and Fars provinces in the southwest. The only observable anomaly for 1-in-200 earthquake losses in  
340 adobe buildings is found in the country's most south-eastern counties in Sistan and Baluchestan province,  
341 particularly along the border with Pakistan. This pattern could be first due to the weighty number of absolutely  
342 vulnerable buildings made of adobe in these areas compared to other parts of the country. The second reason would  
343 be the eminent seismicity of this region, which is influenced by both shallow crustal and subduction seismic zones  
344 of Makran.

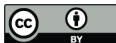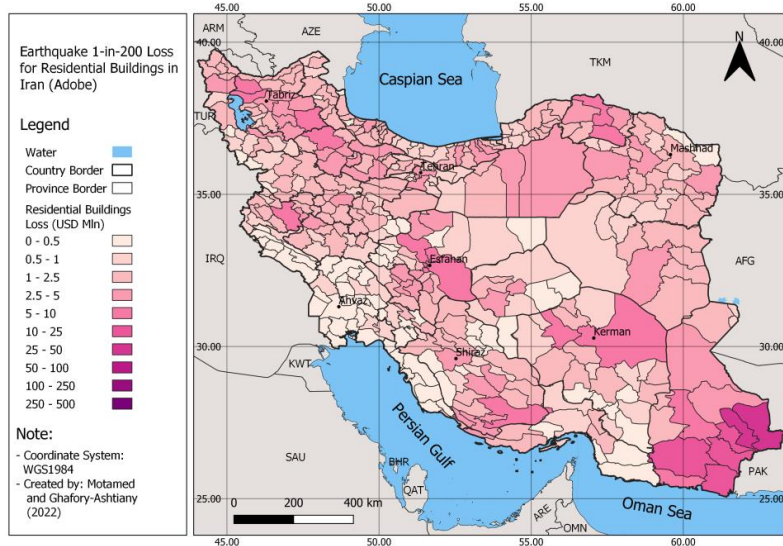

(a)

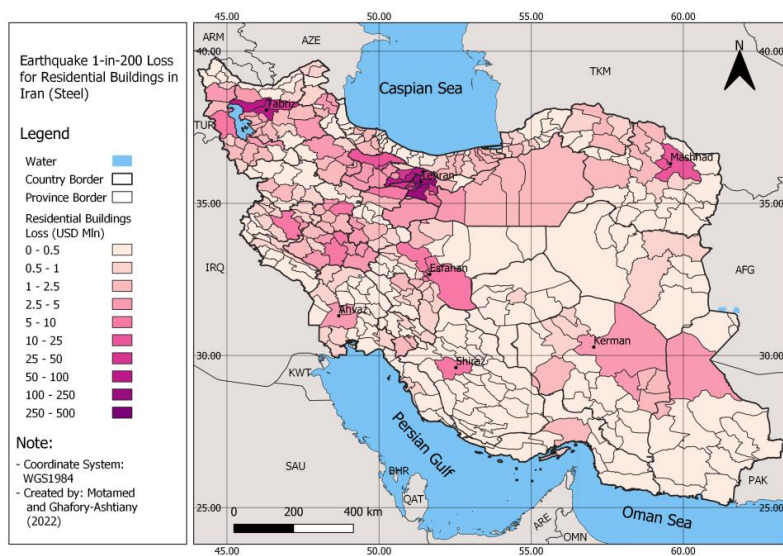

(a)



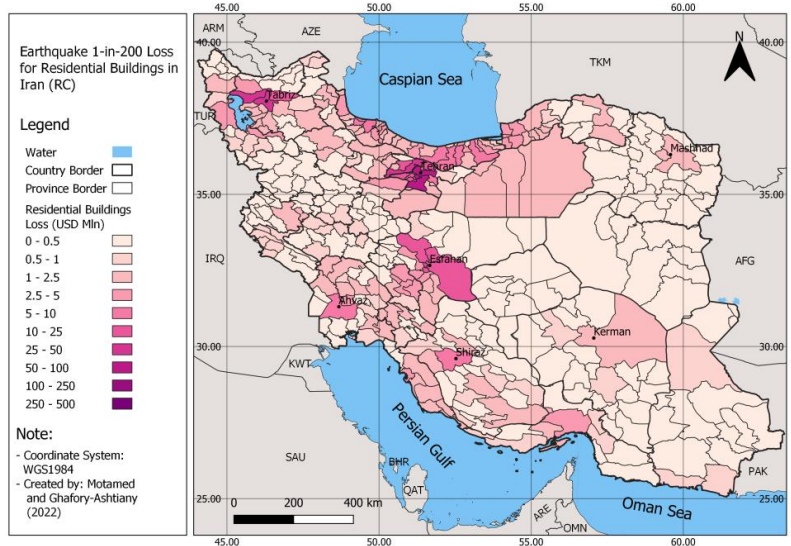

(c)

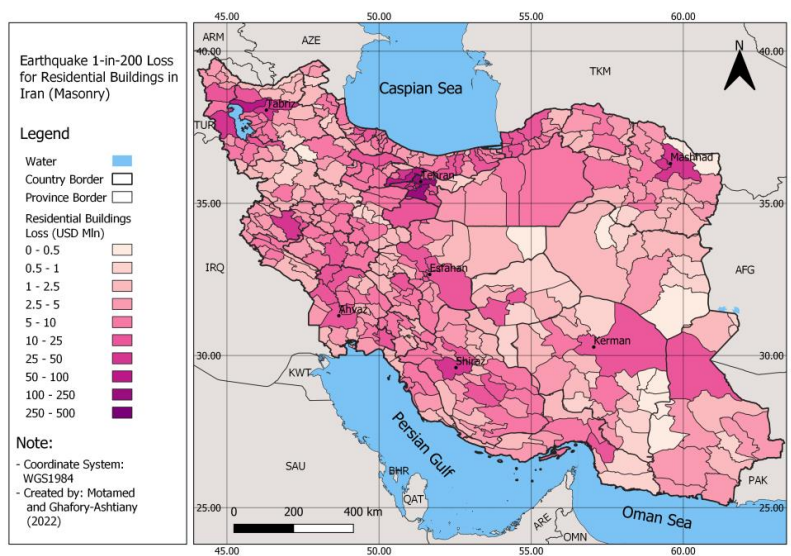

(d)

Figure 6: Earthquake 1-in-100 loss of residential buildings in Iran, adobe (a), steel (b), concrete (c), and masonry (d)

345 Table 2 presents the pure premium rate (AAL rate) of the same cities selected to compare solvency capital charges  
 346 in Section 3. If we draw a comparison between these rates and those used for pricing earthquake insurance in the



347 Iranian market (Table 1), we notice a vast difference, implying a sizeable underestimation of earthquake risk in the  
 348 Iranian insurance industry, including the supervising bodies like CII.

349 This difference is more pronounced for cities with a higher level of seismicity, such as Tabriz (the risk-based AAL is  
 350 7.89 times larger than the market premium for masonry buildings), even after neglecting the loading factors that are  
 351 used to convert pure premium to technical premium. For seismically calmer cities like Esfahan, the discrepancy  
 352 becomes milder, reaching a ratio factor of 0.63 for RC buildings.

**Table 2: Risk-based (modelled) earthquake pure premium rates (in 1000) for different types of selected cities in Iran**

| Province        | County  | City    | Risk-based earthquake pure premium rates |       |          |
|-----------------|---------|---------|------------------------------------------|-------|----------|
|                 |         |         | Masonry                                  | Steel | Concrete |
| Tehran          | Tehran  | Tehran  | 7.15                                     | 2.01  | 1.65     |
| East Azarbayjan | Tabriz  | Tabriz  | 8.68                                     | 3.73  | 3.03     |
| Esfahan         | Esfahan | Esfahan | 1.07                                     | 0.45  | 0.20     |
| Kerman          | Kerman  | Kerman  | 3.35                                     | 0.90  | 1.04     |
| Khuzestan       | Ahvaz   | Ahvaz   | 3.23                                     | 0.83  | 1.00     |

353

354 **4.2 Calculation of Solvency Capital under Solvency-II and Directive 69**

355 Having the earthquake risk results for 1-in-200 loss and the market premium rates for various types of residential  
 356 buildings in Iran, now the solvency capital charge can be calculated at the county (or with an acceptable  
 357 approximation at the city) level according to the methodology suggested by two different solvency regimes, namely  
 358 Solvency-II and the Iranian Directive 69. At first, we consider a hypothetical portfolio of risks in five cities (counties)  
 359 in Iran. It is assumed that 100 residential buildings of masonry, steel and RC types with a total built area of 100,000  
 360 m<sup>2</sup> are covered by earthquake policies in each of the selected cities in the country. The replacement cost for all types  
 361 of buildings is supposed to be USD 300 according to the current market rates.

362 Unlike Directive 69, which uses an algebraic summation of spatially distributed risks, Solvency II employs a  
 363 correlation matrix for aggregating risk capital at the portfolio level (national level). Therefore, we must first define a  
 364 matrix at the province and country levels. Similar to the methodology provided in Annex IV of Directive (2009) and  
 365 CEIOPS (2010), five simplified earthquake correlation matrices were defined for provinces where the selected  
 366 counties exist and another matrix at the national level. The correlation matrices' values were determined based on  
 367 the proximity of admin divisions (counties or provinces): each county has one correlation factor with itself and 0.5  
 368 with its neighbouring county. The same rules apply to the national correlation matrix. However, the correlation  
 369 factor for the neighbouring province was chosen to be 0.25 due to the large dimensions of provinces in Iran. As an  
 370 example, Figure A1 and Table A2 of Appendix indicates the configuration of counties in Tehran province and its  
 371 corresponding earthquake risk correlation matrix based on the methodology suggested.

372 Table 3 shows the results of solvency capital calculation based on the two methodologies at the county, province and  
 373 country for the hypothetical portfolio of risks.

374

375

376



Table 3: Earthquake risk solvency capital based on the methodologies suggested by the Iranian Directive 69 (D-69) and Solvency II (S-II)

| Level     |         | Exposure (USD million) |    |    | D-69 solvency capital rates (x 0.001) |      |      | S-II solvency capital rates (x 0.001) |      |      | D-69 solvency capital (USD) | S-II solvency capital (USD) |
|-----------|---------|------------------------|----|----|---------------------------------------|------|------|---------------------------------------|------|------|-----------------------------|-----------------------------|
|           |         | M                      | S  | RC | M                                     | S    | RC   | M                                     | S    | RC   |                             |                             |
| Location  | Tehran  | 30                     | 30 | 30 | 0.64                                  | 0.29 | 0.29 | 17.00                                 | 4.76 | 3.89 | 36,540                      | 769,500                     |
|           | Tabriz  | 30                     | 30 | 30 | 0.64                                  | 0.29 | 0.29 | 17.25                                 | 8.65 | 6.00 | 36,366                      | 957,000                     |
|           | Esfahan | 30                     | 30 | 30 | 0.45                                  | 0.19 | 0.19 | 3.49                                  | 1.91 | 1.02 | 24,882                      | 192,600                     |
|           | Kerman  | 30                     | 30 | 30 | 0.64                                  | 0.21 | 0.21 | 7.44                                  | 2.74 | 2.42 | 31,842                      | 378,000                     |
|           | Ahvaz   | 30                     | 30 | 30 | 0.45                                  | 0.19 | 0.19 | 6.02                                  | 2.15 | 2.67 | 24,882                      | 325,200                     |
| Portfolio |         |                        |    |    |                                       |      |      |                                       |      |      | 154,512                     | 1,339,296                   |

377

378 As seen in the table, there is at least a 20-fold difference between the solvency capital requirement in the Iranian  
 379 financial supervision institution, CII, and Solvency II for the same portfolio of residential buildings in five distant cities  
 380 of the country. Two drivers cause this discrepancy. The first is the difference between catastrophe capital rates in  
 381 Directive 69 and the Solvency II system. The second reason for such difference is the absence of geographical  
 382 diversification in the Iranian directive, which has a minor magnifying effect at the portfolio level. According to the  
 383 rates exhibited in Table 2, the Solvency II risk-based rates are about twenty times the Directive 69 capital rates. As  
 384 said, this gap is slightly alleviated when aggregating the solvency capital at the portfolio level because of the  
 385 diversification applied in the Solvency II method. It is worth mentioning that the capital charges in the Iranian system  
 386 are simply summed up in the geographical aggregation process. The final portfolio level catastrophe capitals for the  
 387 Iranian and the European system are USD 154,512 and USD 1,339,296, respectively.

## 388 5 Conclusion

389 A numerical analysis was carried out in this paper to compare the methodologies described in the European  
 390 Solvency-II regime and the Central Insurance of Iran for calculating the earthquake risk solvency capital. In the Iranian  
 391 system, a constant factor is used to compute catastrophe charges based on each policy's earned premium and  
 392 incurred losses. On the other hand, the Solvency-II Directive requires a catastrophe risk-based capital calculation for  
 393 each location. There is also a difference between the two methodologies in risk aggregation: while the Iranian  
 394 directive provides no specific method for aggregating capital charges (implying a simple summation), the European  
 395 regime use diversification effect via correlation matrices. The earthquake risk capital charges calculated according  
 396 to the two approaches reveal a considerable difference, with Directive 69 being about ten times smaller than that  
 397 of Solvency-II.

398 Based on the analysis, it seems that the constant-factor approach adopted by the Central Insurance of Iran (CII) for  
 399 calculating solvency capital for earthquake risks is substantially underestimated compared to the equivalent 1-in-  
 400 200 capital size mandated by Solvency II. This can raise serious concerns regarding the ability of the Iranian insurers  
 401 and reinsurers to withstand catastrophic shocks caused by medium to significant earthquake events in major cities  
 402 in Iran. Although, due to the meagre penetration rate of insurance in Iran and the non-occurrence of medium to  
 403 large events in main cities, no catastrophe-related insolvency has been witnessed in Iran, maintaining the current  
 404 approach can compromise the insurance market in Iran and bring about the financial and social challenge in the face  
 405 of future disasters. In addition, by the beginning of the Iran Building Catastrophe Insurance Pool (IBCIP), which  
 406 provides primary insurance coverage for all residential buildings in Iran, insurance companies might find the market



407 favourable to issue supplementary earthquake coverage for Iranian dwellings. If the insurance firms continue to use  
 408 the current premium rates in such a situation, a significant accumulation of risk will occur again due to the vast  
 409 exposure. Therefore, it is recommended that the insurance regulator in Iran initiate a transition from a constant-  
 410 factor-based solvency system to a risk-based one or at least reconsider the current factors with those derived from  
 411 the modelling of catastrophe risks.

412 **6 Appendix**

413 *Table A1: Riskiness of different construction types in Iran (Ghafory-Ashtiany M., 1991)*

| Type | Building Typology                                        | Level of Earthquake Hazard |     |     |     |     |
|------|----------------------------------------------------------|----------------------------|-----|-----|-----|-----|
|      |                                                          | 1                          | 2   | 3   | 4   | 5   |
| 1    | Adobe and Traditional                                    | 1.0                        | 1.1 | 1.2 | 1.5 | 1.8 |
| 2    | Confined Masonry                                         | 0.8                        | 0.9 | 1.0 | 1.4 | 1.6 |
| 3    | Pre-code Steel Structure                                 | 0.6                        | 0.7 | 0.8 | 1.1 | 1.4 |
| 4    | Pre-code Reinforced Concrete                             | 0.4                        | 0.5 | 0.6 | 0.8 | 1.0 |
| 5    | Code Based Buildings Design and Construction (Post 1991) | 0.2                        | 0.3 | 0.4 | 0.6 | 0.8 |

414

415

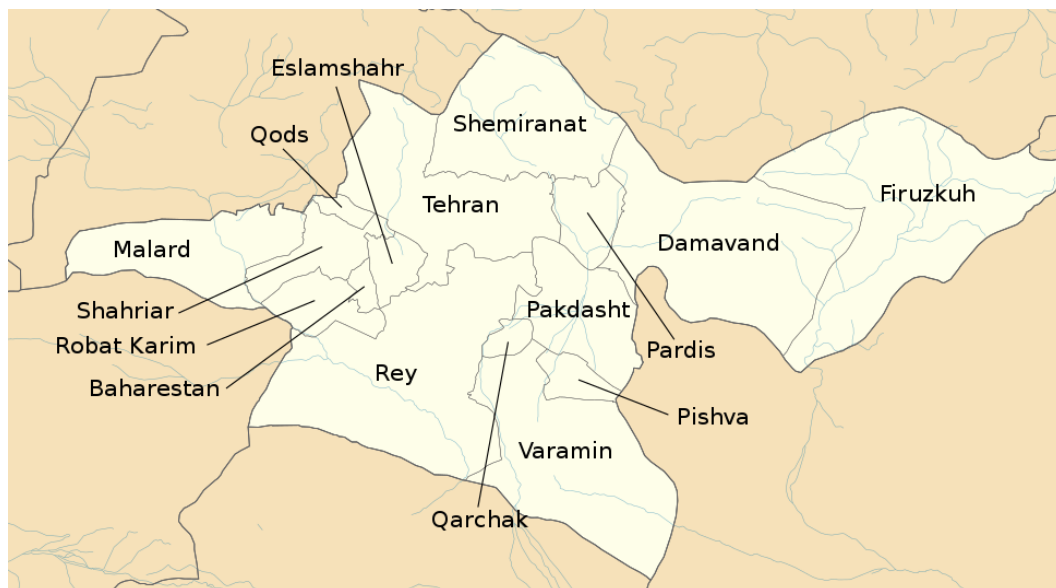

Figure A1: Tehran province and its counties

416

417



418

419

Table A2: Earthquake correlation matrix for Tehran province based on the methodology suggested by Solvency-II

|             | Tehran | Shahriar | Eslamshahr | Baharestan | Malard | Pakdasht | Rey | Qods | Robat Karim | Varamin | Qarchak | Pardis | Damavand | Pishva | Shemiranat | Firuzkuh |
|-------------|--------|----------|------------|------------|--------|----------|-----|------|-------------|---------|---------|--------|----------|--------|------------|----------|
| Tehran      | 1      |          |            |            |        |          |     |      |             |         |         |        |          |        |            |          |
| Shahriar    | 0.5    | 1        |            |            |        |          |     |      |             |         |         |        |          |        |            |          |
| Eslamshahr  | 0.5    | 0.5      | 1          |            |        |          |     |      |             |         |         |        |          |        |            |          |
| Baharestan  | 0      | 0.5      | 0.5        | 1          |        |          |     |      |             |         |         |        |          |        |            |          |
| Malard      | 0      | 0.5      | 0          | 0          | 1      |          |     |      |             |         |         |        |          |        |            |          |
| Pakdasht    | 0.5    | 0        | 0          | 0          | 0      | 1        |     |      |             |         |         |        |          |        |            |          |
| Rey         | 0.5    | 0        | 0.5        | 0          | 0      | 0.5      | 1   |      |             |         |         |        |          |        |            |          |
| Qods        | 0.5    | 0.5      | 0.5        | 0          | 0.5    | 0        | 0   | 1    |             |         |         |        |          |        |            |          |
| Robat Karim | 0      | 0.5      | 0.5        | 0.5        | 0.5    | 0        | 0   | 0    | 1           |         |         |        |          |        |            |          |
| Varamin     | 0      | 0        | 0          | 0          | 0      | 0.5      | 0.5 | 0    | 0           | 1       |         |        |          |        |            |          |
| Qarchak     | 0      | 0        | 0          | 0          | 0      | 0.5      | 0.5 | 0    | 0           | 0.5     | 1       |        |          |        |            |          |
| Pardis      | 0.5    | 0        | 0          | 0          | 0      | 0.5      | 0   | 0    | 0           | 0       | 0       | 1      |          |        |            |          |
| Damavand    | 0.5    | 0        | 0          | 0          | 0      | 0.5      | 0   | 0    | 0           | 0       | 0       | 0.5    | 1        |        |            |          |
| Pishva      | 0      | 0        | 0          | 0          | 0      | 0.5      | 0   | 0    | 0           | 0.5     | 0.5     | 0      | 0        | 1      |            |          |
| Shemiranat  | 0.5    | 0        | 0          | 0          | 0      | 0        | 0.5 | 0    | 0           | 0       | 0       | 0.5    | 0.5      | 0      | 1          |          |
| Firuzkuh    | 0      | 0        | 0          | 0          | 0      | 0        | 0   | 0    | 0           | 0       | 0       | 0      | 0.5      | 0      | 0          | 1        |



420

421 **7 Data Availability**

422 Data used in this research are the intellectual property of Iran National Science Foundation who funded the study  
423 and cannot be shared by the authors.

424 **8 Authors Contribution**

425 In the preparation of this report, Prof. Mohsen Ghafory-Ashtiani has planned the research project and contributed  
426 to the content of different chapters mainly in the earthquake hazard and risk assessment and modelling and review  
427 and validation of results. Dr. Hooman Motamed has been mainly responsible for authoring the insurance regulation  
428 content and numerical analysis. Both authors have equally edited the final manuscript.

429 **9 Competing Interests**

430 The contact author has declared that none of the authors has any competing interests.

431 **10 Acknowledgement**

432 The authors would like to express their gratitude to Iran National Science Foundation for the financial support they  
433 provided for conducting this research work under the research project number 94811162.

434 **11 References**

- 435 Allen, T. I., & Wald, D. J. (2009). On the use of high-resolution topographic data as a proxy for seismic site conditions  
436 (VS30). *Bulletin of the Seismological Society of America*, 935–943.
- 437 Anderson, T. J. (2002). *Innovative financial instruments for natural disaster risk management*. New York: Inter-  
438 American Development Bank.
- 439 Baione, F., De Angelis, P., & Granito, I. (2018). *On a capital allocation principle coherent with the Solvency II standard  
440 formula*. New York: Cornell University.
- 441 Basel Committee on Banking Supervision. (2004). *Basel II: International Convergence of Capital Measurement and  
442 Capital Standards: A revised Framework*. Basel: Bank for International Settlements (BIS).
- 443 Bastami, M., Abbasnejadfar, M., Motamed, H., Ansari, A., & Garakhaninezhad, A. (2022). Development of hybrid  
444 earthquake vulnerability functions for typical residential buildings in Iran. *International Journal of Disaster  
445 Risk Reduction*, Vol. 77, <https://doi.org/10.1016/j.ijdr.2022.103087>.
- 446 Clarke, S., Mitchell, S., & Phelan, E. (2014, July 17). *Capital Management in a Solvency II World*. Retrieved from  
447 Milliman: <https://www.milliman.com/en/insight/2014/capital-management-in-a-solvency-ii-world/>
- 448 Committee of European Insurance and Occupational Pensions Supervisors (CEIOPS). (2010, July 11). *Catastrophe  
449 Task Force Report on the Standardised Scenarios for the Catastrophe Risk Module in the Standard Formula*.  
450 Retrieved from EIOPA: [https://register.eiopa.europa.eu/CEIOPS-Archive/Documents/Reports/CEIOPS-  
451 DOC-79-10-CAT-TF-Report.pdf](https://register.eiopa.europa.eu/CEIOPS-Archive/Documents/Reports/CEIOPS-DOC-79-10-CAT-TF-Report.pdf)
- 452 Council Directive. (1990). Council Directive 90/619/EEC of 8 November 1990 on the coordination of laws, regulations  
453 and administrative provisions relating to direct life assurance, laying down provisions to facilitate the  
454 effective exercise of freedom to provide services and amend. *European Union Official Journal*, 50-61.



- 455 Council Directive. (1992). Council Directive 92/96/EEC on the coordination of laws, regulations and administrative  
456 provisions relating to direct life assurance and amending Directives 79/267/EEC and 90/619/EEC. *European*  
457 *Union Official Journal*, 1-27.
- 458 Danciu, L., Şeşetyan, K., Demircioglu, M., Gülen, L., Zare, M., Basili, R., & al., e. (2018). The 2014 Earthquake Model  
459 of the Middle East: seismogenic sources. *Bulletin of Earthquake Engineering*, Vol. 16, 3465–3496.
- 460 Deligiannakis, G., Zimbidis, A., & Papanikolaou, I. (2021). Earthquake loss and Solvency Capital requirement  
461 calculation using a fault/specific catastrophe model. *Geneva Papers on Risk and Insurance*,  
462 <https://doi.org/10.1057/s41288-021-00259-x>.
- 463 Directive. (1992). Directive 92/49/EEC on the coordination of laws, regulations and administrative provisions relating  
464 to direct insurance other than life assurance and amending Directives 73/239/EEC and 88/357/EEC.  
465 *European Union Official Journal*, 1-23.
- 466 Directive. (2002). Directive 2002/13/EC of the European Parliament and the Council of 5 March 2002 amending  
467 Council Directive 73/239/EEC as regards the solvency margin requirements for non-life insurance  
468 undertakings. *European Union Official Journal*, 17-22.
- 469 Directive. (2002). Directive 2002/83/EC of the European Parliament and of the Council of November 2002 concerning  
470 life assurance. *European Union Official Journal*, No. L345, 1-51.
- 471 Directive. (2009). Directive 2009/138/EC of the European Parliament and the Council of 25 November 2009 on the  
472 taking-up and pursuit of the business of insurance and reinsurance (Solvency II). *European Union Official*  
473 *Journal*, 1-155.
- 474 First Council Directive. (1973). First Council Directive 73/239/EEC on the coordination of laws, regulations and  
475 administrative provisions relating to the taking-up and pursuit of the business of direct insurance other than  
476 life assurance. *European Union Official Journal*, 3-19.
- 477 First Council Directive. (1979). First Council Directive 79/267/EEC of 5 March 1979 on the coordination of laws,  
478 regulations and administrative provisions relating to the taking-up and pursuit of the business of direct life  
479 assurance. *European Union Official Journal*, 1-18.
- 480 Ghafory-Ashtiany, M. (1991). *Earthquake Insurance in Iran*. Tehran: International Institute of Earthquake Engineering  
481 and Seismology (IIEES).
- 482 Ghafory-Ashtiany, M., & Nasserasadi, K. (2012). *Primary Earthquake Insurance Premium Indices for Iranian Buildings*.  
483 Tehran: Insurance Research Center (in Persian).
- 484 Gurenko, E. N., & Itigin, A. (2013). *Reinsurance as Capital Optimization Tool under Solvency II - Policy Research*  
485 *Working Paper*. New York: the World Bank.
- 486 Hashemi, S. A., Safari, A., & Kamali-Dolatabadi, M. (2010). Assessment of Solvency Margin of Insurance Companies  
487 in Iran. *Journal of Insurance Industry*, vol. 25(2), 79-120.
- 488 High Council of Insurance. (2019). *Directive 69: Methods of calculating and monitoring the financial solvency of*  
489 *insurance institutions*. Tehran: Central Insurance of Iran.





- 490 Ibrion, M., Mokhtari, M., & Nadim, F. (2015). Earthquake Disaster Risk Reduction in Iran: Lessons and “Lessons  
491 Learned” from Three Large Earthquake Disasters—Tabas 1978, Rudbar 1990, and Bam 2003. *International*  
492 *Journal Disaster Risk Science*, Vol. 6, 415–427.
- 493 Kelly, G., & Stodolak, P. (2013). *Why insurers fail - Natural Disasters and Catastrophes*. Toronto: Property and Casualty  
494 Insurance Compensation Corporation (PACICC).
- 495 Khodaverdian, A., Zafarani, H., & Rahimian, M. (2016). Using a physics-based earthquake simulator to evaluate  
496 seismic hazard in NW Iran. *Geophysical Journal International*, Vol. 206, No. 1, 379–394.
- 497 Kinder, U., & Ronkainen, V. (2004). Solvency II: towards a new insurance supervisory system in the EU. *Scandinavian*  
498 *Actuarial Journal*, Vol. 6, 462-474.
- 499 Kousky, C., & Cooke, R. (2012). Explaining the failure to insure catastrophic risks. *Geneva papers on Risk and*  
500 *Insurance*, Vol. 37, No. 2, 206-227.
- 501 Lawson, R. C., Card, N., & Vass, G. (2001). *Insurance Industry Catastrophe Management Practices*. New York:  
502 American Academy of Actuaries.
- 503 Linder, U., & Ronkainen, V. (2004). Solvency II / Towards a new insurance supervisorz szstem in the EU. *Scandinavian*  
504 *Actuarial Journal*, Vol. 6, 462/474.
- 505 Maghsoudi, A., & Moshtari, M. (2020). Challenges in disaster relief operations: evidence from the 2017 Kermanshah  
506 earthquake. *Journal of Humanitarian Logistics and Supply Chain Management*, Vol. 11, No. 1, 107-134.
- 507 Mansouri, B., Kiani, A., & Amini-Hosseini, K. (2014). A Platform for earthquake risk assessment in Iran case studies:  
508 Tehran scenarios and Ahar-Varzeghan earthquake. *Journal of Seismology and Earthquake Engineering*, Vol.  
509 16, No. 1, 51–69.
- 510 Mirzaei, N., Gao, M. T., Chen, Y. T., & Wang, J. (1997). A uniform catalog of earthquakes for seismic hazard  
511 assessment in Iran. *Acta Seismologica Sinica English Edition*, Vol. 10, No. 6, 713–726.
- 512 Motamed, H., Calderon, A., Silva, V., & Costa, C. (2019). Development of a probabilistic earthquake loss model for  
513 Iran. *Bulletin of Earthquake Engineering*, Vol. 17, No. 4, pages 1795–1823.
- 514 Pagani, M., Garcia-Pelaez, J., Gee, R., & al., e. (2020). The 2018 version of the Global Earthquake Model: Hazard  
515 component. *Earthquake Spectra*, 226-251.
- 516 Pakdel-Lahiji, N., Hochrainer-Stigler, S., Ghafory-Ashtiany, M., & Sadeghi, M. (2019). Consequences of Financial  
517 Vulnerability and Insurance Loading for the Affordability of Earthquake Insurance Systems : Evidence from  
518 Iran Consequences of Financial Vulnerability and Insurance Loading for the Affordability of Earthquake  
519 Insurance Systems. *Geneva Papers on Risk and Insurance*, Vol. 40, 295–315.
- 520 Rae, R. A., Barret, A., Brooks, D., Chotai, M. A., J., P. A., & C., W. (2018). *A review of Solvency II: Has it met its*  
521 *objectives?* Cambridge: Cambridge University Press.
- 522 Sandström, A. (2019). *Models, Assessment and Regulation*. London: Chapman & Hall .
- 523 Second Council Directive, 8. (1988). of 22 June 1988 on the coordination of laws, regulations and administrative  
524 provisions relating to direct insurance other than life assurance and laying down provisions to facilitate the  
525 effective exercise of freedom to provide services and amendi. *European Union Official Journal* , 1-2.

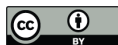

- 526 Şeşetyan, K., Danciu, L., Demircioğlu, M., Giardini, D., Erdik, M., Akkar, S., . . . al., e. (2018). The 2014 Earthquake  
527 Model of the Middle East: overview and results. *Bulletin of Earthquake Engineering*, Vol. 16, pages 3535–  
528 3566.
- 529 Shahbazi, P., Mansouri, B., Ghafory-Ashtiany, M., & Käser, M. (2020). Introducing loss transfer functions to model  
530 seismic financial loss: A case study of Iran. *International Journal of Disaster Risk Reduction*, Vol. 51,  
531 <https://doi.org/10.1016/j.ijdr.2020.101883>.
- 532 Shahriar, B., Sayyadzadeh, A., Emdadi, F., Hasanzadeh, A., Jafari, A., Safari, A., & Keshavarz Haddad, G. (2016). *Review*  
533 *of the Method for Calculating and Monitoring the Financial Solvency of Insurance Firms*. Tehran: Insurance  
534 Research Center, Research Report No. 58.
- 535 Tavakoli, B., & Ghafory-Ashtiany, M. (1999). Seismic hazard assessment of Iran. *Annali di Geofisica*, Vol. 42, No. 6,  
536 1013–1021.
- 537 Thorburn, C. (2004). *On the Measurement of Solvency of Insurance Companies*. New York: World Bank Policy  
538 Research Working Paper 3199.
- 539 Yazdani, A., & Kowsari, M. (2013). Bayesian estimation of seismic hazards in Iran. *Scientia Iranica*, Vol. 20, No. 3,  
540 422–430.
- 541
- 542
- 543
- 544
